# Supplementary material
Source: PubMed Central journal article supplement (PMC3356430)
Supplement: 11_203_Zerfaoui_Suppl.pdf [file 11_203_Zerfaoui_Suppl.pdf]

Supplemental Data

**Poly(ADP-Ribosyl)ation of High Mobility Group Box 1 (HMGB1) Protein Enhances Inhibition of Efferocytosis**

Kasey Davis, Sami Banerjee, Arnaud Friggeri, Celeste Bell, Edward Abraham, and Mourad Zerfaoui

Online address: <http://www.molmed.org>

The Feinstein Institute for Medical Research North Shore LIJ

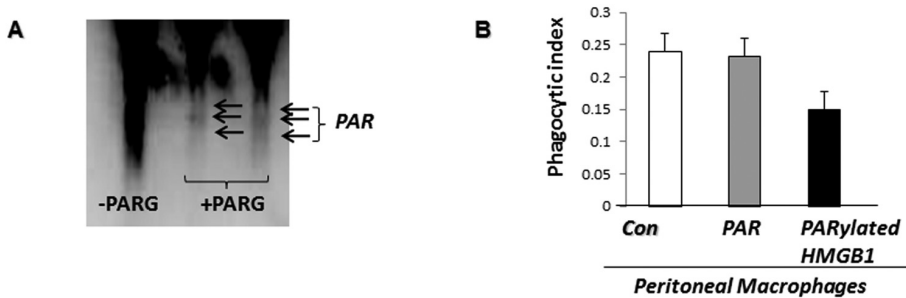

**Figure S1. Production of free PAR by PARG digestion.** (S1-A). PARP-1 protein was incubated in a poly(ADP-ribosyl)ation reaction for 30 min at 37°C. PARG was then added to the reaction for 30 min at 37°C. Separation of free PAR from PARP-1 was performed using Amicon Ultra 0.5 filters. A portion (10%) of the reaction mixture was used for immunoblot analysis with antibodies to PAR. (S1-B). Free PAR or PARylated HMGB1 was incubated with peritoneal macrophages for 2 h before the addition of apoptotic thymocytes. Representative gels are shown. A second independent experiment provided similar results.

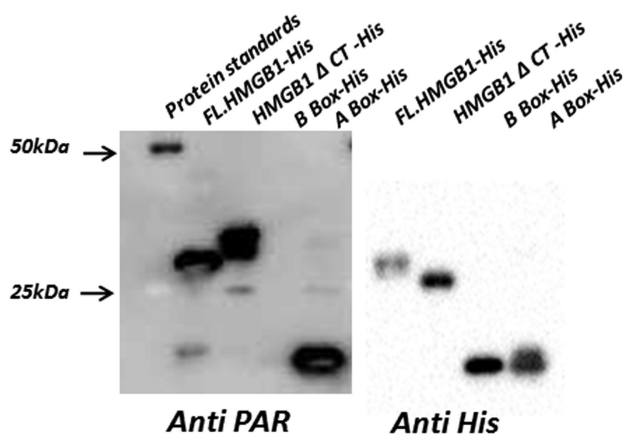

**Figure S2. PARylation of full length HMGB1 and HMGB1 domains by PARP-1.** Full length HMGB1-His,  $\Delta$ C-HMGB1-His, HMGB1 A Box-His, or HMGB1 B Box-His (500 ng/ml) were incubated with recombinant PARP-1 in poly(ADP-ribosyl)ation reactions. The reactions were terminated with sample buffer and subjected to immunoblot analysis with antibodies to poly(ADP-ribose) (PAR) or His. Results from a representative experiment are shown. A second experiment provided similar findings.
